# Supplementary material for: Nanostructured microspheres of MnO2formed by room temperature solution processing
Source: Royal Society of Chemistry journal article supplement (doi:10.1039/b713201h), 2007-11-01
Supplement: b713201h.pdf [file b713201h.pdf]

## Supplementary Information

# Nanostructured Microspheres of MnO<sub>2</sub> formed by Room Temperature Solution Processing

Jonathan P. Hill, Sher Alam, Katsuhiko Ariga,  
Christopher E. Anson, and Annie K. Powell

### Contents

- Figure S1.** X-ray crystal structure of the product from the reaction between MnCl<sub>2</sub>·4H<sub>2</sub>O and cyclen in the presence of sodium perchlorate.  
(a) Sheet-like structure formed by hydrogen bonding between dioxo dinuclear manganese complex and its chloride counteranions.  
(b) Edge-on-view of the sheet showing the corrugated structure.
- Figure S2.** Energy Dispersive X-ray Spectrum (EDX) of the nanostructured microspheres
- Figure S3.** Survey scan XPS spectrum of the nanostructured microspheres
- Figure S4.** FTIR spectra of cyclen and the nanostructured microspheres.
- Figure S5.** Temperature dependency of the magnetic moment of the nanostructured microspheres.

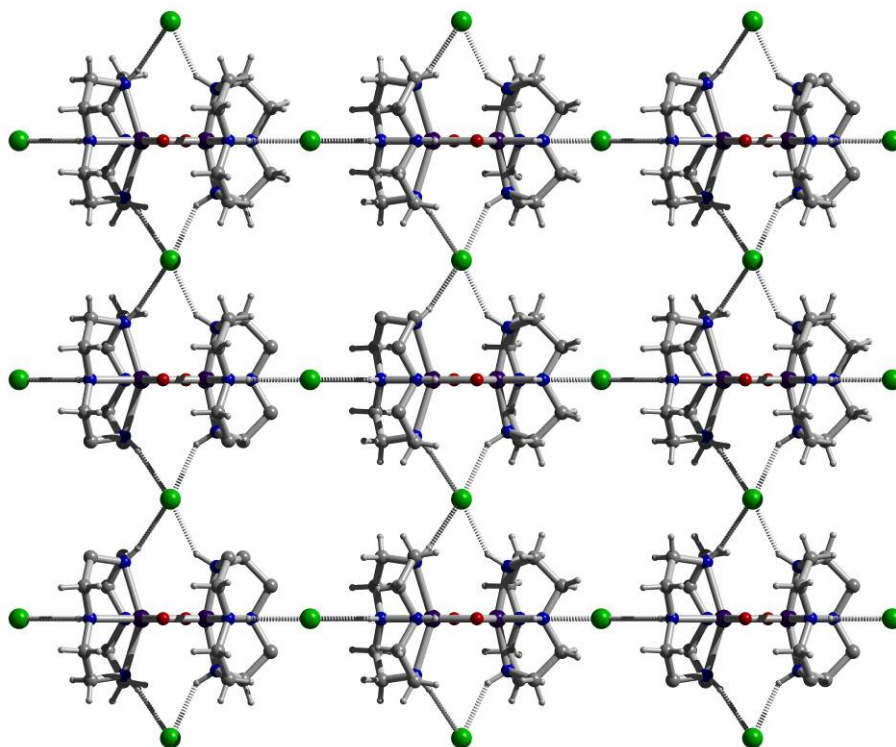

**Figure S1(a).** X-ray crystal structure of the product from the reaction between  $\text{MnCl}_2 \cdot 4\text{H}_2\text{O}$  and cyclen in the presence of sodium perchlorate. Sheet-like structure formed by hydrogen bonding between dioxo dinuclear manganese complex and its chloride counteranions. (Viewed down the c-axis.)

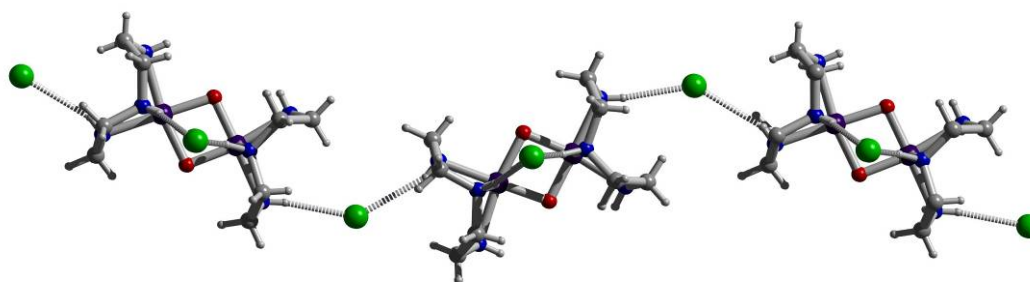

**Figure S1(b).** X-ray crystal structure of the product from the reaction between  $\text{MnCl}_2 \cdot 4\text{H}_2\text{O}$  and cyclen in the presence of sodium perchlorate. Edge-on-view of the sheet showing a corrugated structure. (Viewed down the b-axis.)

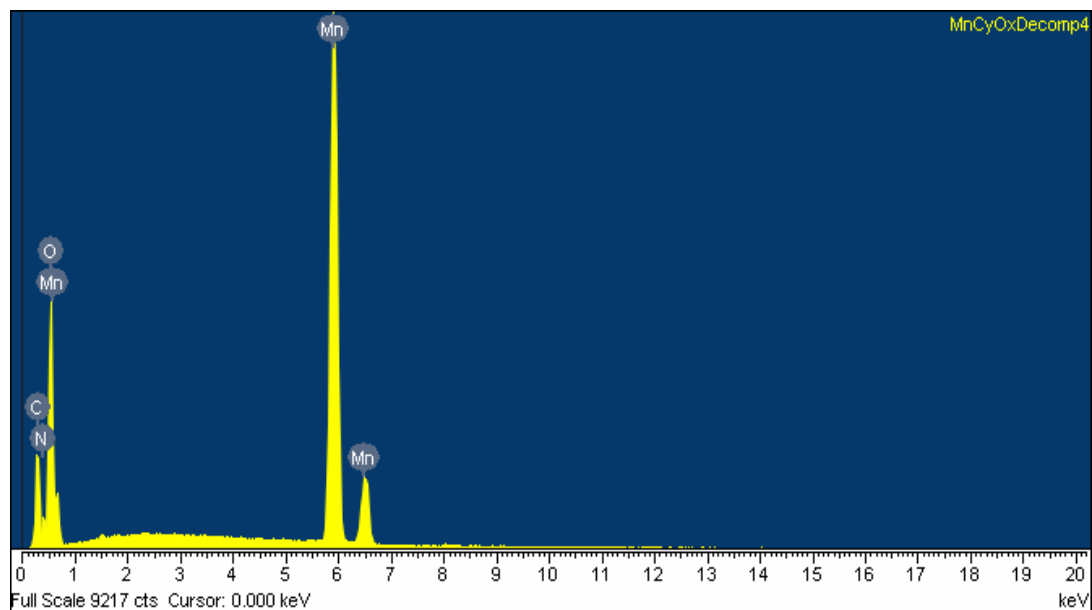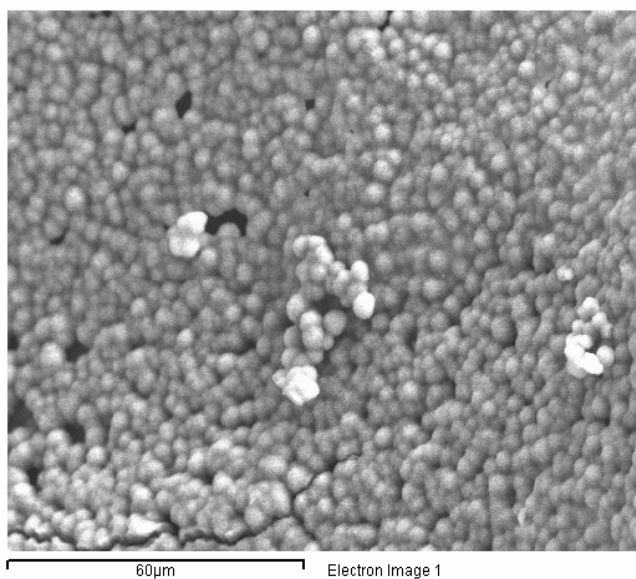

| Element | Weight% |
|---------|---------|
| C K     | 16.59   |
| N K     | 7.56    |
| O K     | 24.68   |
| Mn K    | 51.18   |
| Total   | 100.00  |

**Figure S2.** EDX analysis of the nanostructured microspheres.

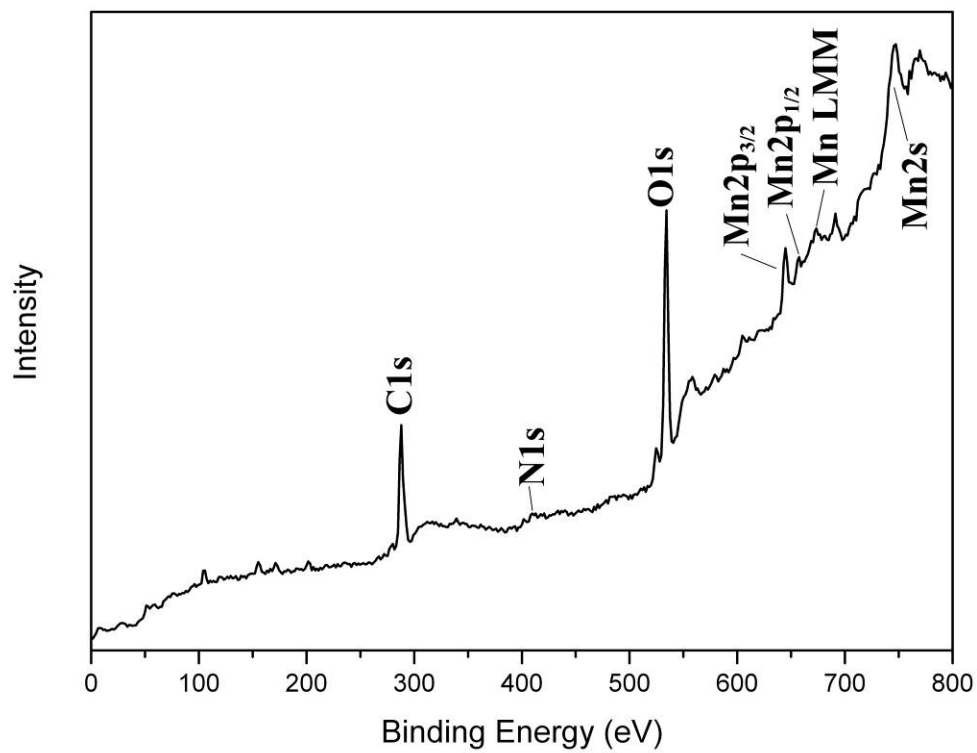

**Figure S3.** Survey scan XPS spectrum of the nanostructured microspheres

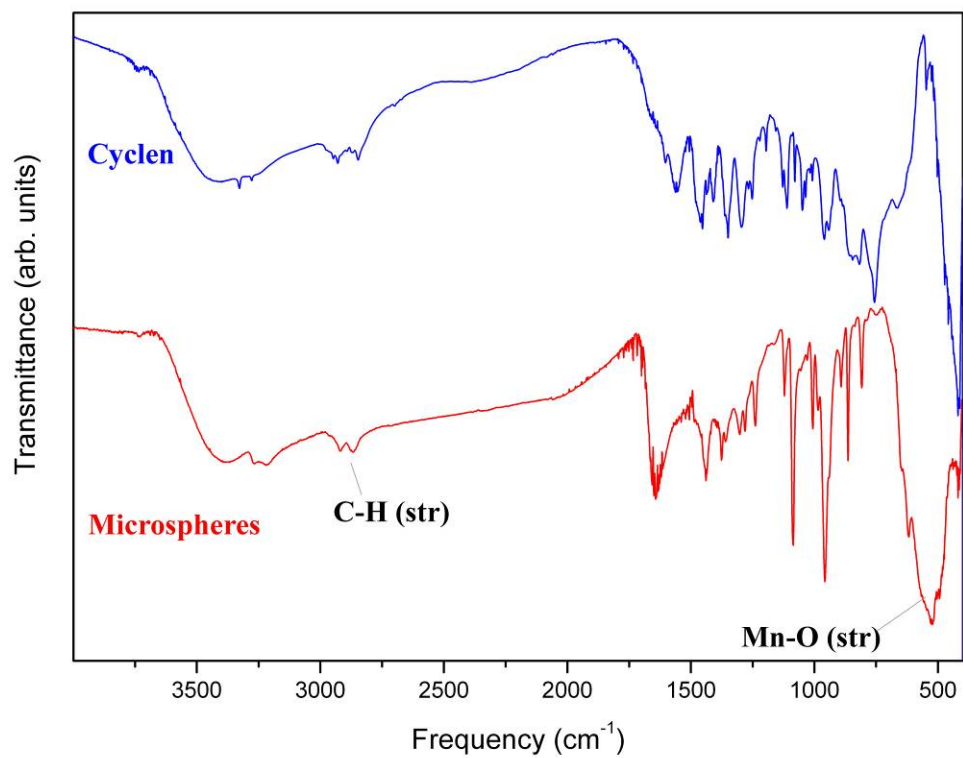

**Figure S4.** FTIR spectra of cyclen and the nanostructured microspheres.

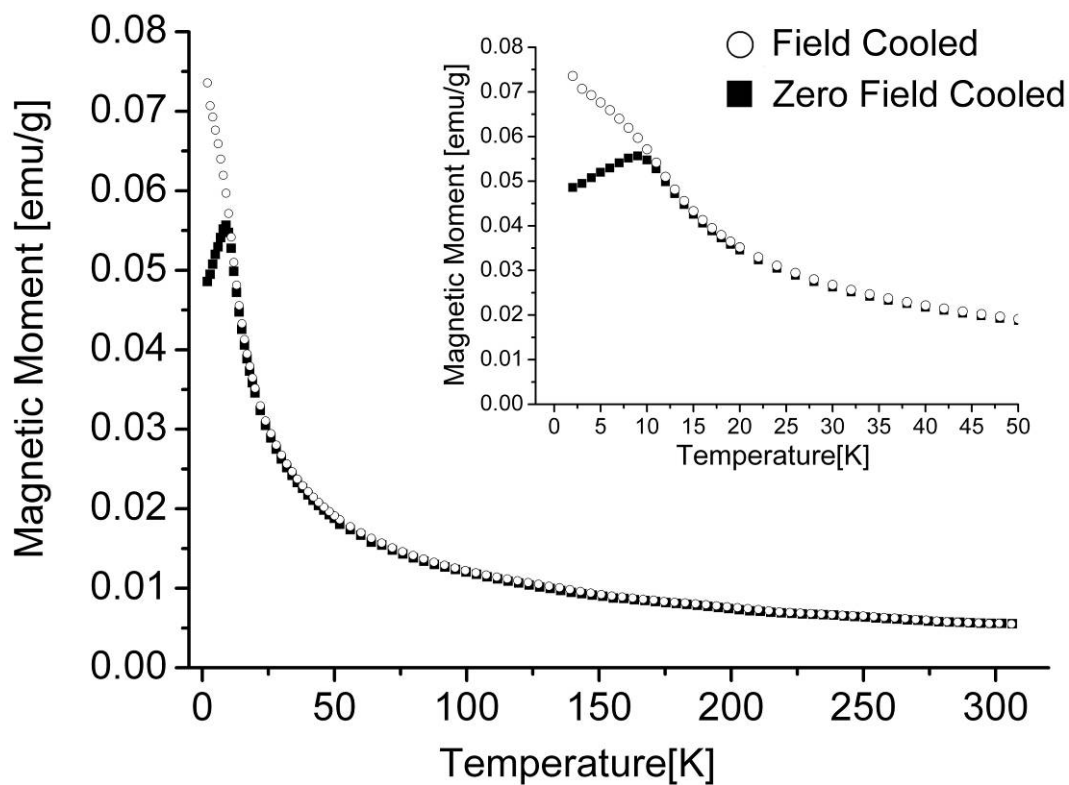

**Figure S5.** Temperature dependence of the magnetic moment of the nanostructured microspheres derived from the reaction between manganese oxalate and cyclen. Inset shows expansion of the sub-50K region. (Magnetic susceptibility measurements were carried out on a Quantum Design MPMS operating at 5 Tesla.)
